# Supplementary material for: A Spatially Continuous Model of Carbohydrate Digestion and Transport Processes in the Colon
Source: PLOS journal article supplement (doi:10.1371/journal.pone.0145309), 2015-12-17
Supplement: S1 (10.1371/journal.pone.0145309.s001) [file journal.pone.0145309.s001]

# S1 Appendix. Mathematical Details

## 1 Overview

The large intestine is the distal most portion of the gastro-intestinal tract. It is responsible for the final absorption of digestive nutrients and preparation of fecal matter for bowel movements [1]. It is an open tube-like organ with muscular walls to aid in the continued transport of eventual waste materials. The walls of the colon are also lubricated with endogenously produced mucus. The colon is often described in three separate locations: the proximal (or ascending), transverse, and distal (or descending) colon. These three locations have differing physical conditions, specifically with regard to the acidity (with locations closer to the proximal end being more acidic than towards the distal end) and the absorption/transportation rates at which substrates are removed from the colon [1]. The colon's biochemical environment makes it a highly suitable habitat to dense communities of microflora. One of the primary functions of the intestinal microflora is to digest chemically indigestible materials (such as dietary fiber). Metabolites generated through this digestion process are absorbed by the gut, and waste material is transported along the length of the colon. Thus, we can think of colon functionality as being defined by three sub-processes with dynamics governed by the interaction of a complex network of microflora, substrates, metabolites and physical forces, in multiple physically and biochemically diverse environments: (i) the digestion of particulate material, (ii) the exchange of soluble

22 materials between biochemical environments (lumen-mucus-host), and (iii)  
 23 the convective transport of materials through the length of the colon.

By way of material balance, we can combine the three sub-processes and describe the density of materials in the colon with the following advection-reaction system:

$$\partial_t \mathbf{c} + \partial_x F(\mathbf{c}) = R(\mathbf{c}) + E(\mathbf{c}) \quad (1)$$

24 where the functions  $R$ ,  $F$  and  $E$  can be interpreted as non-linear functions  
 25 describing the sub-processes of anaerobic digestion, material transport, and  
 26 component exchange, respectively, and their input,  $\mathbf{c}$ , is a vector of concen-  
 27 trations [g/L] of all materials considered in the colon-complex. We describe  
 28 functions  $R$ ,  $F$  and  $E$  in detail in the following sections, but present Fig-  
 29 ure 1 as a schematic representation of the model structure and foundational  
 30 processes.

## 31 1.1 Assumptions

32 Physiological systems are highly complex, functioning with redundancy, time-  
 33 variations and interplay with other systems [3]. Rather than model the entire  
 34 physiology of the colon, we look to capture the integral mechanisms defining  
 35 the colon-diet-flora system with as little complexity as possible. We introduce  
 36 the following simplifications for model development:

- 37 • **Colon Geometry:** A cross-sectional slice of the colon would display  
 38 highly irregular geometry, as there exists mucousal folds and villous

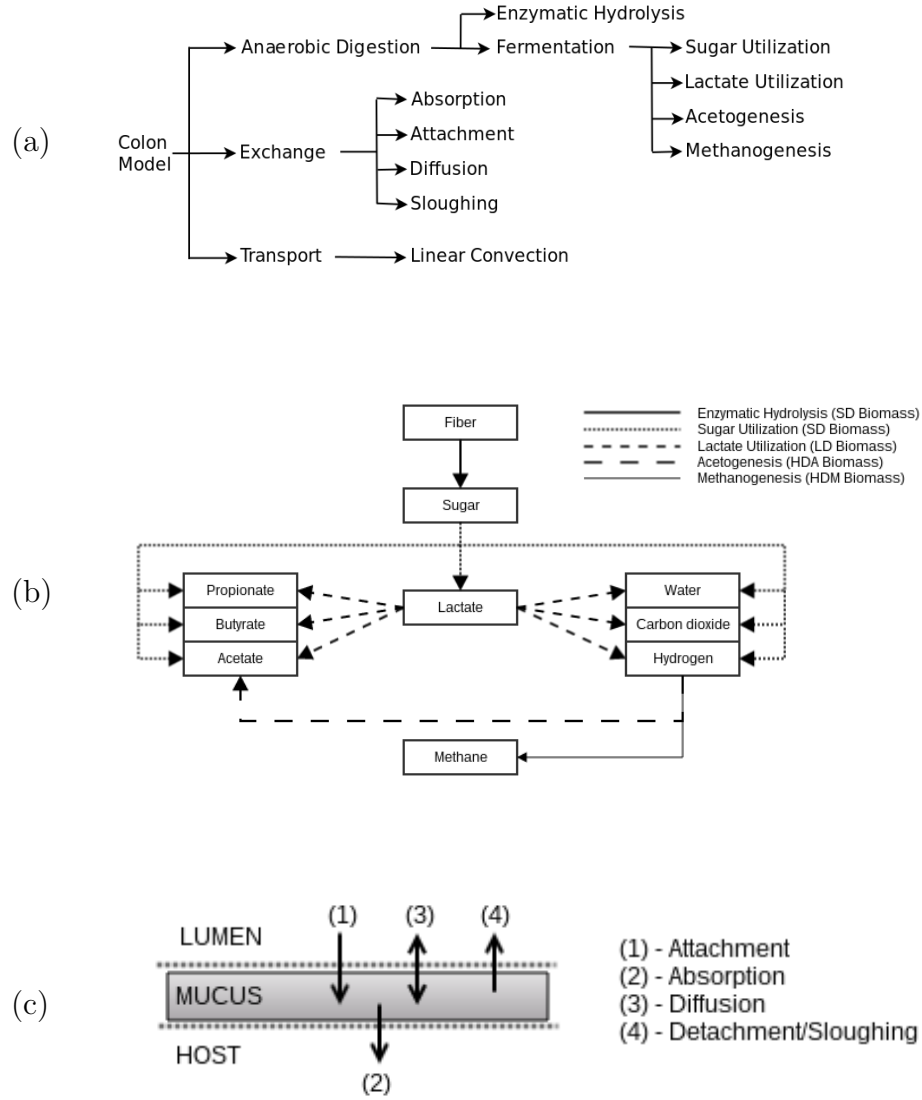

Figure 1: Non-technical overview of compuGUTs underlying mathematical model. (a) Schematic overview of biochemical and physical processes considered in the compuGUT. (b) 5-step model of anaerobic digestion, adapted from [2]. Biomass functional group active in each step indicated in parentheses. (c) Summary of component exchange processes. Material in the lumen environment is transported along the length of the colon where as mucus material is stationary along the length of the colon and only experiences axial transport.

39 surfaces [4, 5]. For simplicity, the geometry of the large intestine is  
40 averaged as a cylindrical tube of constant diameter. Combining this  
41 simplification with the knowledge that the length of the colon is sig-  
42 nificantly larger than its diameter allows us to model the colon as 1-  
43 dimensional in space (x-dimension)

44 • **Material Properties:** To be consistent with our first assumption (1D  
45 tube geometry), we assume that the materials in localized portions  
46 of the colon (a particular x-value) will be homogeneous (well-mixed)  
47 across the cross-sectional area.

48 • **Mucus Thickness:** Mucus is produced endogenously through out the  
49 colon. The rate of this mucus production is constant in all locations.  
50 Additionally, we treat this layer as a fixed medium of constant volume,  
51 with the volume of the mucus being 10% of the total colon volume.

52 • **Transit Time:** The effect of peristalsis and additional propulsion  
53 mechanisms manifest as an average flow or speed of convective trans-  
54 port. This allows us to approximate convective transport as a first-  
55 order flux with constant velocity term.

56 • **Metabolic Pathways:** The only macromolecules reaching the colon  
57 are carbohydrates, and the anaerobic digestion of carbohydrates follows  
58 the metabolic pathway described in [2]. This metabolic pathway can  
59 be summarized as a five-step process (highlighted in Figure 1b), where

fiber is first hydrolyzed to monomer sugars, and then monomer sugars  
 are fermented by intestinal microflora into various metabolites (lactate,  
 acetate, propionate, butyrate, hydrogen, methane, carbon dioxide, and  
 water) in the parallel processes of sugar utilization, lactate utilization,  
 acetogenesis and methanogenesis. Though there are over 400 species of  
 microbes inhabiting the colon [6], we assume that the total flora in the  
 colon can be sub-divided into four biomass functional groups according  
 by fermentation step. Thus we define flora as either Sugar Fermenters  
 (SD), Lactate Fermenters (LD), Hydrogen Oxidizing Acetogens (HDA),  
 or Hydrogen Oxidizing Methanogens (HDM). Hydrolysis progresses due  
 to enzymes produced by SD flora. These assumptions are adapted  
 directly from the works of [7, 8, 2], and is a familiar approach in most  
 lines of microbial modeling and engineering.

- Reaction Processes:** Combining the processes involved in metabolism  
 and the natural decay of flora in the system, we can summarize the re-  
 action processes in the flora-diet system as: (1) hydrolysis, (2) glucose  
 utilization, (3) lactate utilization, (4) acetogenesis, (5) methanogenesis,  
 (6) decay of SD flora, (7) decay of LD flora, (8) decay of HDA flora, and  
 (9) decay of HDM flora. The choice of metabolic pathways and sub-  
 sequent reaction processes is responsible for the overall model problem  
 size, thus a simpler representation of anaerobic digestion would lead to  
 a smaller state-space, and a more involved representation of anaerobic  
 digestion would lead to a larger state space.

83 We remark that the model assumptions and simplifications can be relaxed  
84 on future model iterations as knowledge of functional details continues to  
85 grow, but doing so would require the inclusion of additional mathematical  
86 and numerical complexities.

## 87 **1.2 Notation**

88 For organizational convenience, we introduce notation conventions prior to  
89 proceeding with the model construction. With the size, complexity and in-  
90 cluded variability of the mathematical description, the model is more natu-  
91 rally suited for numerical investigation. Accordingly, we follow a computa-  
92 tional array/indexing organization scheme, which will also allow for discus-  
93 sion of the software implementation.

### 94 **1.2.1 Indices**

95 Our primary indices are  $i$ ,  $j$ , and  $e$ . Index  $i$  indicates particularity within  
96 a solution array/parameter grouping. Index  $j$  indicates particularity within  
97 index  $i$  (if needed). Index  $e$ , when associated with a model variable or pa-  
98 rameter indicate the biochemical environment (lumen or mucus) in which  
99 that particular component exists or parameter is used. Index  $e$  takes the  
100 value 1 if describing a lumen variable, and 2 if identifying a mucus variable.  
101 Descriptions of the solution arrays and parameter groupings in which these  
102 indices are used is to follow, and will aid in clarity.

### 103 1.2.2 Dependent variables

104 We notate our comprehensive solution array (all dependent variables) by the  
 105 vector  $\mathbf{c}$  - concentration, where  $\mathbf{c} = [\mathbf{S}, \mathbf{I}, \mathbf{X}]^T$ , and the components of sub-  
 106 solution arrays  $\mathbf{S}$  - soluble substrates/metabolites/compounds,  $\mathbf{I}$  - insoluble  
 107 carbohydrates, and  $\mathbf{X}$  - biomass, are defined as follows:

$$S_{e,i_s} \quad \text{where } i_s \in [1, 2, 3, 4, 5, 6, 7, 8, 9], \quad (2)$$

$$I_{e,i_i} \quad \text{where } i_i \in [1], \quad (3)$$

$$X_{e,i_x,j_{i_x}} \quad \text{where } i_x \in [1, 2, 3, 4],$$

$$j_{i_x} \in [1, 2, \dots, n_{i_x}], \quad (4)$$

and index  $e \in [1, 2]$  is as previously defined. All dependent variables are concentrations measured in [g/L]. The use of subscripts with indices  $i$  and  $j$  is to make clear that their values are dependent on the solution array ( $\mathbf{S}, \mathbf{I}, \mathbf{X}$ ) or biomass functional group (in the case of  $j$ ) being considered. Moving forward, we drop these subscripts for legibility whenever possible but do include them in situations which may otherwise read ambiguously. The use of index  $j$  when describing biomass quantities is to identify *a strain or species* within the biomass functional group indexed by  $i$ , where the maximum value of  $j$  is  $n_i$ . That is,  $X_{2,3,5}$  would identify the concentration of the 5th *species* of acetogenic biomass ( $i = 3$ ) in the mucus environment ( $e = 2$ ). Details on how strains are defined are to follow in Section 2.1.2. A summary list of

dependent variables, including their mathematical identification and numerical implementation indices is given in Table 1. Referring back to the overall solution array  $\mathbf{c}$ , we can summarize the overall problem (system) size as:

$$\dim(\mathbf{c}) = \max(e) \times \left( \max(i_s) + \max(i_i) + \sum_{i=1}^{\max(i_x)} \max(j_i) \right), \quad (5)$$

110 detailing that the problem size is equal to the sum of the maximum number  
 111 of substrate, fiber, and biomass representations multiplied by the number  
 112 of environments (lumen and mucus). For the most simple model scenario  
 113 we present (1 strain per biomass functional group), this would mean a state  
 114 vector of 28 elements (9 substrates, 1 fiber, 4 biomass functional groups,  
 115 1 strain per biomass functional group, 2 environments), and for the most  
 116 complex scenario that we have tested, a state vector of 100 elements (9 sub-  
 117 strates, 1 fiber, 4 biomass functional groups, 10 strain per biomass functional  
 118 group, 2 environments).

### 119 1.2.3 Parameters

120 The model contains many parameters of similar definition, so standardized  
 121 notation is used to maintain organization.

122 There are four primary groups of parameters: yield coefficients ( $Y$ ), ki-  
 123 netic rates ( $\kappa$ ), half-saturation constants and concentrations ( $K$ ), and ex-  
 124 change rates ( $\gamma$ ). Additional physical (lengths, volumes, etc.) and opera-  
 125 tional (variance, spline constants) parameters exist, but will be described as  
 126 they are introduced in the text.



Table 1: Summary of dependent variable notation used to describe the colon-complex. C.Index indicates the index value used in numerical implementation, whereas indices  $i$ ,  $j$  and  $e$  indicate index values used for mathematical development, as described in Section 1.2.

| C.Index                    | Solution Array | $i$ | $j$   | $e$ | Component                                      |
|----------------------------|----------------|-----|-------|-----|------------------------------------------------|
| 1                          | S              | 1   | 1     | 1   | Lumen glucose                                  |
| 2                          |                | 1   | 2     | 2   | Mucus glucose                                  |
| 3                          |                | 2   | 1     | 1   | Lumen lactate                                  |
| 4                          |                | 2   | 2     | 2   | Mucus lactate                                  |
| 5                          |                | 3   | 1     | 1   | Lumen hydrogen                                 |
| 6                          |                | 3   | 2     | 2   | Mucus hydrogen                                 |
| 7                          |                | 4   | 1     | 1   | Lumen acetate                                  |
| 8                          |                | 4   | 2     | 2   | Mucus acetate                                  |
| 9                          |                | 5   | 1     | 1   | Lumen propionate                               |
| 10                         |                | 5   | 2     | 2   | Mucus propionate                               |
| 11                         |                | 6   | 1     | 1   | Lumen butyrate                                 |
| 12                         |                | 6   | 2     | 2   | Mucus butyrate                                 |
| 13                         |                | 7   | 1     | 1   | Lumen methane                                  |
| 14                         |                | 7   | 2     | 2   | Mucus methane                                  |
| 15                         |                | 8   | 1     | 1   | Lumen carbon dioxide                           |
| 16                         |                | 8   | 2     | 2   | Mucus carbon dioxide                           |
| 17                         |                | 9   | 1     | 1   | Lumen water                                    |
| 18                         |                | 9   | 2     | 2   | Mucus water                                    |
| 19                         | I              | 1   | 1     | 1   | Lumen polysaccharide (fiber)                   |
| 20                         |                | 1   | 2     | 2   | Mucus polysaccharide (mucin)                   |
| $2(10) + 1$                | X              | 1   | 1     | 1   | Lumen sugar utilizing biomass - strain 1       |
| $\vdots$                   |                |     |       |     |                                                |
| $2(10 + n_1)$              |                | 1   | $n_1$ | 2   | Mucus sugar utilizing biomass - strain $n_1$   |
| $2(10 + n_1) + 1$          |                | 2   | 1     | 1   | Lumen lactate utilizing biomass - strain 1     |
| $\vdots$                   |                |     |       |     |                                                |
| $2(10 + n_1 + n_2)$        |                | 2   | $n_2$ | 2   | Mucus lactate utilizing biomass - strain $n_2$ |
| $2(10 + n_1 + n_2) + 1$    |                | 3   | 1     | 1   | Lumen acetogenic biomass - strain 1            |
| $\vdots$                   |                |     |       |     |                                                |
| $2(10 + \sum_i^3 n_i)$     |                | 3   | $n_3$ | 2   | Mucus acetogenic biomass - strain $n_3$        |
| $2(10 + \sum_i^3 n_i) + 1$ |                | 4   | 1     | 1   | Lumen methanogenic biomass - strain 1          |
| $\vdots$                   |                |     |       |     |                                                |
| $2(10 + \sum_i^4 n_i)$     |                | 4   | $n_4$ | 2   | Mucus methanogenic biomass - strain $n_4$      |

127 Yield coefficients describe the affects of anaerobic reaction process on the  
 128 density of system variable. We use the following standard notation:

$$Y_{i_c, p_r, j_{i_x}} \quad \text{where } p_r \in [1, 2, 3, 4, 5, 6, 7, 8, 9],$$

$$j_{i_x} \in [1, 2, \dots, n_{i_x}] \quad (6)$$

129 indicating the yield of system variable  $i_c$  consumed or generated in the anaer-  
 130 obic reaction process (see Section 1.1)  $p_r$  performed by strain  $j_{i_x}$  of biomass  
 131 functional group  $i_x$ . It should be noted that yield coefficients exist for all  
 132 components of vector  $\mathbf{c}$ , hence the use of index  $i_c$ . That said, not all compo-  
 133 nents are involved in all processes, leading to yield coefficients of zero.

134 Kinetic parameters specify the maximum rate at which a reaction process  
 135 indexed by  $p_r$  and governed by biomass strain  $j_{i_x}$  proceeds, and takes the  
 136 standard notation:

$$\kappa_{p_r, j_{i_x}} \quad \text{where } p_r \in [1, 2, 3, 4, 5, 6, 7, 8, 9],$$

$$j_{i_x} \in [1, 2, \dots, n_{i_x}]. \quad (7)$$

137 Similarly, many of our considered reaction kinetics have half saturation  
 138 constants or concentrations, following the standard notation:

$$K_{p_r, j_{i_x}} \quad \text{where } p_r \in [1, 2, 3, 4, 5, 6, 7, 8, 9],$$

$$j_{i_x} \in [1, 2, \dots, n_{i_x}]. \quad (8)$$

139 Lastly, specific rates are used to describe the way material is exchanged  
 140 between biochemical environments using 4 exchange mechanisms indexed by

141  $p_e$ , taking the standard notation:

$$\gamma_{i_c, p_e} \quad \text{where } p_e \in [1, 2, 3, 4]. \quad (9)$$

142 Like yield coefficients, exchange rates exists for all components of the  
143 solution array  $\mathbf{c}$  for each exchange process, which is why we use the index  $i_c$ .  
144 A complete list of all biochemical reaction (Yield and rate coefficients) and  
145 exchange parameters with default values is provided in Tables 2 and 3, and  
146 all physical and operation parameters are defined in Tables 4 and 5.

## 147 **2 Model Development**

148 We construct the mathematical model using material balances to describe  
149 how quantities in the colon-complex change with time and space. The result  
150 is a system of partial differential equations with functional representations  
151 of sub-processes as summarized in (1).

### 152 **2.1 Anaerobic Digestion**

153 As noted in our primary assumptions, the choice of anaerobic digestion/metabolic  
154 pathway is key to determining the size and structure of the mathematical  
155 model. Digestion occurs throughout the length of the colon, and in both  
156 the lumen and mucus environments. For clarity, we describe our model of  
157 anaerobic digestion independent of location and environment.

Table 2: List of default simulation biochemical reaction parameters. **YC**: Yield Coefficient, **SR**: Specific Rate **CR**: Concentration Ratio, **HS**: Half-Saturation. Column one presents the parameter reference number used in the sensitivity analysis. Yield coefficients are derived using stoichiometry balances (Section 2.1). Reaction parameter values adapted from [2]. Yield parameters are described in grams of product per gram of limiting reactant for ease of identification.

| SA ref. | Symbol         | Parameter                                        | Value                                          |
|---------|----------------|--------------------------------------------------|------------------------------------------------|
|         | $Y_{1,1}$      | YC sugar from fiber                              | $1 \text{ } g_{su}/g_z$                        |
|         | $Y_{2,2}$      | YC lactate from sugar                            | $0.0901 \text{ } g_{la}/g_{su}$                |
|         | $Y_{3,2}$      | YC hydrogen from sugar                           | $0.00606 \text{ } g_{H_2}/g_{su}$              |
|         | $Y_{4,2}$      | YC acetate from sugar                            | $0.12121 \text{ } g_{ac}/g_{su}$               |
|         | $Y_{5,2}$      | YC propionate from sugar                         | $0.14949 \text{ } g_{pro}/g_{su}$              |
|         | $Y_{6,2}$      | YC butyrate from sugar                           | $0.04444 \text{ } g_{but}/g_{su}$              |
|         | $Y_{3,3}$      | YC hydrogen from lactate                         | $0.00444 \text{ } g_{H_2}/g_{la}$              |
|         | $Y_{4,3}$      | YC acetate from lactate                          | $0.06667 \text{ } g_{ac}/g_{la}$               |
|         | $Y_{5,3}$      | YC propionate from lactate                       | $0.16444 \text{ } g_{pro}/g_{la}$              |
|         | $Y_{6,3}$      | YC butyrate from lactate                         | $0.09778 \text{ } g_{but}/g_{la}$              |
|         | $Y_{4,4}$      | YC acetate from hydrogen                         | $2.14286 \text{ } g_{ac}/g_{H_2}$              |
|         | $Y_{7,5}$      | YC methane from hydrogen                         | $0.57143 \text{ } g_{CH_4}/g_{H_2}$            |
|         | $Y_{8,2}$      | YC carbon dioxide from sugar                     | $0.13333 \text{ } g_{CO_2}/g_{su}$             |
|         | $Y_{8,3}$      | YC carbon dioxide from lactate                   | $0.14667 \text{ } g_{CO_2}/g_{la}$             |
|         | $Y_{8,4}$      | YC carbon dioxide from hydrogen (acetogenesis)   | $-11.000 \text{ } g_{CO_2}/g_{H_2a}$           |
|         | $Y_{8,5}$      | YC carbon dioxide from hydrogen (methanogenesis) | $-9.42857 \text{ } g_{CO_2}/g_{H_2}$           |
|         | $Y_{9,2}$      | YC aqueous water from sugar                      | $0.12364 \text{ } g_{H_2O}/g_{su}$             |
|         | $Y_{9,3}$      | YC aqueous water from lactate                    | $0.20000 \text{ } g_{H_2O}/g_{la}$             |
|         | $Y_{9,4}$      | YC aqueous water from hydrogen (acetogenesis)    | $6.42857 \text{ } g_{H_2O}/g_{H_2a}$           |
|         | $Y_{9,5}$      | YC aqueous water from hydrogen (methanogenesis)  | $6.42857 \text{ } g_{H_2O}/g_{H_2m}$           |
|         | $Y_{11,2}$     | YC sugar degrading bacteria                      | $0.3424 \text{ } g_{X_{su}}/g_{su}$            |
|         | $Y_{12,3}$     | YC lactate degrading bacteria                    | $0.37667 \text{ } g_{X_{la}}/g_{la}$           |
|         | $Y_{13,4}$     | YC acetogenic bacteria                           | $4.035714 \text{ } g_{X_{H_2a}}/g_{H_2}$       |
|         | $Y_{14,5}$     | YC methanogenic bacteria                         | $4.035714 \text{ } g_{X_{H_2m}}/g_{H_2}$       |
| 1       | $\kappa_1$     | SR hydrolysis                                    | $10.6195 \text{ } g_z/g_{X_{su}} \cdot d$      |
| 2       | $\kappa_2$     | SR sugar consumption                             | $12.6271 \text{ } g_{su}/g_{X_{su}} \cdot d$   |
| 3       | $\kappa_3$     | SR lactate consumption                           | $82.1083 \text{ } g_{la}/g_{X_{la}} \cdot d$   |
| 4       | $\kappa_4$     | SR hydrogen consumption by acetogenic bacteria   | $1.9263 \text{ } g_{H_2}/g_{X_{H_2a}} \cdot d$ |
| 5       | $\kappa_5$     | SR hydrogen consumption by methanogenic bacteria | $0.3997 \text{ } g_{H_2}/g_{X_{H_2m}} \cdot d$ |
| 6       | $K_1$          | CR (hydrolysis)                                  | $0.2654 \text{ } g_z/g_{X_{su}}$               |
| 7       | $K_2$          | HS concentration sugar                           | $0.4684 \text{ } g_{su}/L$                     |
| 8       | $K_3$          | HS concentration lactate                         | $0.5969 \text{ } g_{la}/L$                     |
| 9       | $K_4$          | HS concentration hydrogen (acetogenesis)         | $0.0034 \text{ } g_{H_2}/L$                    |
| 10      | $K_5$          | HS concentration hydrogen (methanogenesis)       | $3.126 \times 10^{-6} \text{ } g_{H_2}/L$      |
| 11-14   | $\kappa_{6-9}$ | SR biomass decay                                 | $0.01 \text{ } d^{-1}$                         |

Table 3: Matrix of exchange terms for soluble substrates, polysaccharides and biomass concentrations. Functions  $E_1, E_2, E_3$ , and  $E_4$  represent transport from lumen to mucus, from mucus to host, between lumen and mucus, and from mucus to lumen, respectively. The *shape* of exchange parameter  $\gamma$  as a function of colon location (Described in Section 2.2) is shown as a spark figure, with the discrete values in the proximal (P), transverse (T) and distal (D) colon provided in brackets. Exchange parameters are in the units  $[d^{-1}]$  except with respect to transport between lumen and mucus ( $E_3$ ), where the units are  $[L/d]$ . Discrete parameter values taken from [2].

| Process, $p_e$ | $E_1 [L \rightarrow M]$      | $E_2 [M \rightarrow H]$      | $E_3 [L \leftrightarrow M]$                          | $E_4 [L \leftarrow M]$       |
|----------------|------------------------------|------------------------------|------------------------------------------------------|------------------------------|
| Component k    | $\gamma_1$                   | $\gamma_2$                   | $\gamma_3$                                           | $\gamma_4$                   |
| 1 $s_s$        |                              |                              |                                                      |                              |
| 2 $s_l$        |                              |                              |                                                      |                              |
| 3 $s_h$        | [0.88/0.43/2.03]             | [12.6]                       | [1.6/3.8/6.3]                                        |                              |
| 4 $s_{ac}$     |                              |                              |                                                      |                              |
| 5 $s_{pr}$     | [1.32/0.64/3.05]             | [18.9]                       |                                                      |                              |
| 6 $s_{bu}$     | [1.07/0.62/2.47]             | [15.32]                      |                                                      |                              |
| 7 $s_{ch_4}$   | [0.9/0.6/2.49]               | [12.88]                      |                                                      |                              |
| 8 $s_{co_2}$   | [1/0.6/3]                    | [14]                         |                                                      |                              |
| 9 $s_{h_2o}$   | [1/0.6/3]                    | [14]                         |                                                      |                              |
|                | [1.6/0.77/3.66]              | [1.6]                        |                                                      |                              |
| 10 $z$         |                              |                              |                                                      |                              |
| 11 $b_s$       |                              |                              |                                                      |                              |
| 12 $b_l$       | [0.1]                        |                              |                                                      | [0.1]                        |
| 13 $b_a$       | [0.1]                        |                              |                                                      | [0.4]                        |
| 14 $b_m$       | [0.1]                        |                              |                                                      | [0.4]                        |
| Kinetic Rate   | $E_1 = \gamma_{1,k} c_{1,k}$ | $E_2 = \gamma_{2,k} c_{2,k}$ | $E_3 = \frac{\gamma_{3,k}}{V_l} (c_{1,k} - c_{2,k})$ | $E_4 = \gamma_{4,k} c_{2,k}$ |

Table 4: Physical parameters required for simulation. Parameter values adapted from [2].

| Symbol    | Parameter                                              | Default Value |
|-----------|--------------------------------------------------------|---------------|
| $L_c$     | Length of colon [m]                                    | 1.524         |
| $d_c$     | Average diameter of the colon [cm]                     | 7.62          |
| $L_s$     | Length of small intestine [m]                          | 6.096         |
| $d_s$     | Average diameter of small intestine [cm]               | 2.54          |
| $V_c$     | Volume of colon [L]                                    | 6.95          |
| $V_l$     | Volume of lumen environment [L]                        | 6.255         |
| $V_m$     | Volume of mucus environment [L]                        | 0.695         |
| $L_{p,t}$ | Proximal-Transverse colon length transition percentage | 0.14          |
| $L_{t,s}$ | Transverse-Distal colon length transition percentage   | 0.42          |
| $q$       | Average system flow rate [L/d]                         | 7             |

Table 5: Operation parameters required for simulation. Parameter values adapted from [2].

| Symbol              | Parameter                                           | Default Value |
|---------------------|-----------------------------------------------------|---------------|
| $n_1$ ( $n_{sd}$ )  | Number of sugar utilizing biomass representatives   | 1             |
| $n_2$ ( $n_{ld}$ )  | Number of lactate utilizing biomass representatives | 1             |
| $n_3$ ( $n_{hda}$ ) | Number of acetogenic biomass representatives        | 1             |
| $n_4$ ( $n_{hdm}$ ) | Number of methanogenic biomass representatives      | 1             |
| $\sigma_b$          | Variance of biochemical reaction parameters         | 0.05          |
| $\sigma_p$          | Variance of exchange parameters                     | 0.0           |
| $\sigma_s$          | Cubic spline interpolation range (percentage)       | 0.1           |
| $k$                 | Grid Index value                                    | 0             |
| $N$                 | Number of grid points $((50)2^k + 1)$               | 51            |

### 158 2.1.1 MT-Model

159 A model of anaerobic digestion specific to the environmental conditions of  
 160 the human colon was developed in [2], simplifying the Anaerobic Digestion  
 161 Model No. 1 (ADM1) system described in [8] to only consider carbohydrate  
 162 particulate waste (as opposed to including proteins and lipids as well), and  
 163 employ lumen and mucus *environments* to describe the colons physical struc-  
 164 ture. We refer to this model as the MT-model of carbohydrate digestion. The  
 165 resulting model describes anaerobic digestion in two processes (enzymatic hy-  
 166 drolysis and fermentation) consisting of five metabolic steps, all of which are  
 167 driven by the presence of microflora, and the natural decay of biomaterial  
 168 from the system.

**Enzymatic Hydrolysis:** Enzymatic hydrolysis is the degradation of polysaccharides into simple monosaccharides in the presence of enzymes produced by sugar utilizing biomass. The complete process of enzymatic hydrolysis is quite complex and is composed of a large number of intermediate steps [9, 10]; however, mathematical models of the rate of hydrolysis are often simplified to statements of first-order based on observation and empirical data [11]. In [2], the authors suggest modeling hydrolysis by *Contois* kinetics, as equations of this form are well adapted for modeling a wide range of substrate-biomass scenarios [12]. As such, we model the rate of hydrolysis ( $\phi_1$ ) as follows:

$$\phi_1 = \frac{\kappa_1 I X_1}{I + K_1 X_1}, \quad (10)$$

where variables and parameters are as previously defined.

**Fermentation:** Fermentation is the process of converting simple sugars to short-chain fatty acids, simple compounds and gases. The steps within fermentation, which occur both sequentially and in parallel, create time sensitivities and model stiffness. Additionally, the rates at which these steps occur is a product of microflora concentration and substrate/metabolite availability. The rates for (i) glucose utilization, (ii) lactate utilization, (iii) acetogenesis, and (iv) methanogenesis, are all modeled using *Monod* kinetics, as:

$$\phi_f = \frac{\kappa SX}{K + S} I_{pH}, \quad (11)$$

where  $S$  is the concentration of substrate utilized by biomass  $X$  in the completion of a particular fermentation step and  $I_{pH}$  is a rate inhibition term due to acidity. Most fermentation steps are not pH inhibited, thus  $I_{pH} = 1$ . The rate of methanogenesis is inhibited as follows:

$$I_{pH} = \begin{cases} \exp(-3 \left( \frac{pH - pH_u}{pH_u - pH_l} \right)^2) & \text{if } pH < pH_u, \\ 1 & \text{if } pH \geq pH_u, \end{cases} \quad (12)$$

where  $pH_u$  and  $pH_l$  are upper and lower pH limits that are dependent on colon location [2, 8].

**Natural Decay:** The effects of age and damage do apply to microbial systems [13]. This natural decay is included as:

$$\phi_d = \kappa X, \quad (13)$$



176 where  $X$  is a biomass concentration and  $\kappa$  is the specific rate of decay  
 177 for that particular biomass strain.

178 **Derivation of Yield Coefficients:** Each process in the fermentation  
 179 of simple sugars to SCFAs can be expressed by a balanced chemical  
 180 equation describing the change from reactants to products. For exam-  
 181 ple, Glucose Fermentation can be described by:

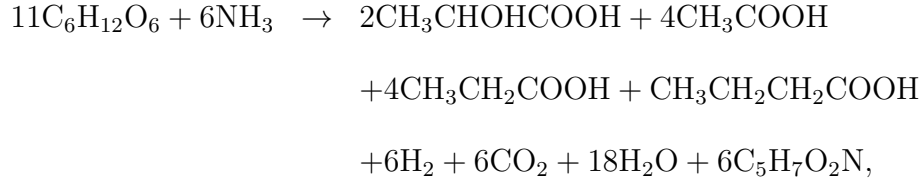

182 where 11 moles of glucose and 6 moles of ammonia create 2 moles of  
 183 lactate, 4 moles of acetate, 4 moles of propionate, a mole of butyrate,  
 184 6 moles of hydrogen, 6 moles of carbon dioxide, 18 moles of water and  
 185 6 moles of biomass, respectively. Biomass involved in glucose utiliza-  
 186 tion is referred to as sugar fermenting or sugar utilizing biomass. The  
 187 chemical formula for biomass,  $\text{C}_5\text{H}_7\text{O}_2\text{N}$ , is an approximation adapted  
 188 directly from [8]. Complete chemical balances are provided in Muñoz-  
 189 Tamayo et. al [2]. For ease of analysis, Tables 6-9 are presented in  
 190 place of chemical formula to describe the complete reactions associated  
 191 with fermentation.

192 Yield coefficients for each product in each reaction process are derived  
 193 using the mass basis of the process limiting reactant. Process limiting

194 reactants are identified using boldface in each of the respective tables.  
 195 For example, the yield of propionate (product) from lactate (reactant)  
 196 during lactate fermentation is calculated as:

$$\begin{aligned}
 Y_{5,3} &= \frac{\text{Mass Propionate}}{-\text{Mass Lactate}} \\
 &= \frac{\text{Mol. Pro} \times \text{MM Pro}}{-\text{Mol. Lac} \times \text{MM Lac}} = \frac{2 \times 74}{-(-10) \times 90} \approx 0.16444
 \end{aligned}$$

197 where values for stoichiometric coefficients and molar mass are provided  
 198 in Table 7, and the indices 5 and 3 correspond with the Peterson Matrix  
 199 shown as Table 10.

Using the described rate equations and derived yield coefficients, the time evolution of material  $c_i$  in the resulting *reaction terms* can be written as a set of differential equations in the form:

$$R(c_i) = \dot{c}_i = \sum_{j=1}^9 Y_{i,j} \phi_j, \quad (14)$$

200 where variables, processes and indices are as defined in the previous sections  
 201 and correspond with the Peterson Matrix in Table 10. Analysis of the mass  
 202 conservation of these reaction terms follows in Section 4.3.

### 203 **2.1.2 eMT-Model**

In [14], the authors extend the ADM1 model to simulate *strains* of biomass within a biomass functional group. These *strains* can be identified within a group based on their specified biochemical reaction parameters. We adapt this idea to extend the MT-model of [2] to consider multiple strains as well,

Table 6: Derived yield coefficients for components involved in fermentation step 1: Glucose Utilization.

| Index <i>i</i> | Material             | Mol. Count | Mol. Mass [g/mol] | Mass [g] | Yield Coefficient [g/g] |
|----------------|----------------------|------------|-------------------|----------|-------------------------|
| 1              | <b>glucose</b>       | -11        | 180               | -1980    | -1                      |
|                | ammonia <sup>a</sup> | -6         | 17                | -102     | -0.05152                |
| 2              | lactate              | 2          | 90                | 180      | 0.09091                 |
| 3              | hydrogen             | 6          | 2                 | 12       | 0.00606                 |
| 4              | acetate              | 4          | 60                | 240      | 0.12121                 |
| 5              | propionate           | 4          | 74                | 296      | 0.14949                 |
| 6              | butyrate             | 1          | 88                | 88       | 0.04444                 |
| 7              | methane              | 0          | 16                | 0        | 0                       |
| 8              | carbon dioxide       | 6          | 44                | 264      | 0.13333                 |
| 9              | water                | 18         | 18                | 324      | 0.12364                 |
| 10             | Fiber                | -          | -                 | -        | 0                       |
| 11             | SD Biomass           | 6          | 113               | 678      | 0.3424                  |
| 12             | LD Biomass           | 0          | 113               | 0        | 0                       |
| 13             | HDA Biomass          | 0          | 113               | 0        | 0                       |
| 14             | HDM Biomass          | 0          | 113               | 0        | 0                       |
| Sum:           |                      |            |                   | 0        | 4e-5                    |

**a** - ammonia sources assumed to be readily available and are not formally tracked in mathematical model.

Table 7: Derived yield coefficients for components involved in fermentation step 2: Lactate Utilization.

| Index <i>i</i> | Material             | Mol. Count | Mol. Mass [g/mol] | Mass [g] | Yield Coefficient [g/g] |
|----------------|----------------------|------------|-------------------|----------|-------------------------|
| 1              | glucose              | 0          | 180               | 0        | 0                       |
|                | ammonia <sup>a</sup> | -3         | 17                | -51      | -0.056667               |
| 2              | <b>lactate</b>       | -10        | 90                | -900     | -1                      |
| 3              | hydrogen             | 2          | 2                 | 4        | 0.00444                 |
| 4              | acetate              | 1          | 60                | 60       | 0.06667                 |
| 5              | propionate           | 2          | 74                | 148      | 0.16444                 |
| 6              | butyrate             | 1          | 88                | 88       | 0.09778                 |
| 7              | methane              | 0          | 16                | 0        | 0                       |
| 8              | carbon dioxide       | 3          | 44                | 132      | 0.14667                 |
| 9              | water                | 10         | 18                | 180      | 0.20000                 |
| 10             | Fiber                | -          | -                 | -        | 0                       |
| 11             | SD Biomass           | 0          | 113               | 0        | 0                       |
| 12             | LD Biomass           | 3          | 113               | 339      | 0.37667                 |
| 13             | HDA Biomass          | 0          | 113               | 0        | 0                       |
| 14             | HDM Biomass          | 0          | 113               | 0        | 0                       |
| Sum:           |                      |            |                   | 0        | 3e-6                    |

**a** - ammonia sources assumed to be readily available and are not formally tracked in mathematical model.

Table 8: Derived yield coefficients for components involved in fermentation step 3: Hydrogen Utilizing Acetogenesis.

| Index <i>i</i> | Material             | Mol. Count | Mol. Mass [g/mol] | Mass [g] | Yield Coefficient [g/g] |
|----------------|----------------------|------------|-------------------|----------|-------------------------|
| 1              | glucose              | 0          | 180               | 0        | 0                       |
|                | ammonia <sup>a</sup> | -1         | 17                | -17      | -0.60714                |
| 2              | lactate              | 0          | 90                | 0        | 0                       |
| 3              | <b>hydrogen</b>      | -14        | 2                 | -28      | -1                      |
| 4              | acetate              | 1          | 60                | 60       | 2.14286                 |
| 5              | propionate           | 0          | 74                | 0        | 0                       |
| 6              | butyrate             | 0          | 88                | 0        | 0                       |
| 7              | methane              | 0          | 16                | 0        | 0                       |
| 8              | carbon dioxide       | -7         | 44                | -308     | -11.000                 |
| 9              | water                | 10         | 18                | 180      | 6.42857                 |
| 10             | Fiber                | -          | -                 | -        | 0                       |
| 11             | SD Biomass           | 0          | 113               | 0        | 0                       |
| 12             | LD Biomass           | 0          | 113               | 0        | 0                       |
| 13             | HDA Biomass          | 1          | 113               | 113      | 4.03571                 |
| 14             | HDM Biomass          | 0          | 113               | 0        | 0                       |
| Sum:           |                      |            |                   | 0        | 0                       |

**a** - ammonia sources assumed to be readily available and are not formally tracked in mathematical model.

Table 9: Derived yield coefficients for components involved in fermentation step 4: Hydrogen Utilizing Methanogenesis.

| Index <i>i</i> | Material             | Mol. Count | Mol. Mass [g/mol] | Mass [g] | Yield Coefficient [g/g] |
|----------------|----------------------|------------|-------------------|----------|-------------------------|
| 1              | glucose              | 0          | 180               | 0        | 0                       |
|                | ammonia <sup>a</sup> | -1         | 17                | -17      | -0.60714                |
| 2              | lactate              | 0          | 90                | 0        | 0                       |
| 3              | <b>hydrogen</b>      | -14        | 2                 | -28      | -1                      |
| 4              | acetate              | 0          | 60                | 0        | 0                       |
| 5              | propionate           | 0          | 74                | 0        | 0                       |
| 6              | butyrate             | 0          | 88                | 0        | 0                       |
| 7              | methane              | 1          | 16                | 16       | 0.57143                 |
| 8              | carbon dioxide       | -6         | 44                | -264     | -9.42857                |
| 9              | water                | 10         | 18                | 180      | 6.42857                 |
| 10             | Fiber                | -          | -                 | -        | 0                       |
| 11             | SD Biomass           | 0          | 113               | 0        | 0                       |
| 12             | LD Biomass           | 0          | 113               | 0        | 0                       |
| 13             | HDA Biomass          | 0          | 113               | 0        | 0                       |
| 14             | HDM Biomass          | 1          | 113               | 113      | 4.035714                |
| Sum:           |                      |            |                   | 0        | 4e-6                    |

**a** - ammonia sources assumed to be readily available and are not formally tracked in mathematical model.

Table 10: Peterson Matrix of biochemical/metabolic reaction terms for soluble substrates, polysaccharide carbohydrates and biomass concentrations without biomass strain refinement. Adapted from [2].

| <i>For soluble components</i> |                     |           |           |           |           |           |           |           |           |             |
|-------------------------------|---------------------|-----------|-----------|-----------|-----------|-----------|-----------|-----------|-----------|-------------|
|                               | Component i         | 1         | 2         | 3         | 4         | 5         | 6         | 7         | 8         | 9           |
| $p_r$                         | Process             | $S_1$     | $S_2$     | $S_3$     | $S_4$     | $S_5$     | $S_6$     | $S_7$     | $S_8$     | $S_9$       |
| 1                             | Hydrolysis          | $Y_{1,1}$ |           |           |           |           |           |           |           |             |
| 2                             | Glucose utilization | -1        | $Y_{2,2}$ | $Y_{3,2}$ | $Y_{4,2}$ | $Y_{5,2}$ | $Y_{6,2}$ |           | $Y_{8,2}$ | $Y_{9,2}$   |
| 3                             | Lactate utilization |           | -1        | $Y_{3,3}$ | $Y_{4,3}$ | $Y_{5,3}$ | $Y_{6,3}$ |           | $Y_{8,3}$ | $Y_{9,3}$   |
| 4                             | Homoacetogenesis    |           |           | -1        | $Y_{4,4}$ |           |           | $Y_{7,5}$ | $Y_{8,4}$ | $Y_{9,4}$   |
| 5                             | Methanogenesis      |           |           | -1        |           |           |           |           | $Y_{8,5}$ | $Y_{9,5}$   |
|                               |                     |           |           |           |           |           |           |           |           | $\phi_1(c)$ |
|                               |                     |           |           |           |           |           |           |           |           | $\phi_2(c)$ |
|                               |                     |           |           |           |           |           |           |           |           | $\phi_3(c)$ |
|                               |                     |           |           |           |           |           |           |           |           | $\phi_4(c)$ |
|                               |                     |           |           |           |           |           |           |           |           | $\phi_5(c)$ |

  

| <i>For particulate components</i> |                     |       |            |            |            |            |                                                                                                                                            |  |  |  |
|-----------------------------------|---------------------|-------|------------|------------|------------|------------|--------------------------------------------------------------------------------------------------------------------------------------------|--|--|--|
|                                   | Component i         | 10    | 11         | 12         | 13         | 14         | Kinetic Rate                                                                                                                               |  |  |  |
| j                                 | Process             | $I_1$ | $X_1$      | $X_2$      | $X_3$      | $X_4$      |                                                                                                                                            |  |  |  |
| 1                                 | Hydrolysis          | -1    |            |            |            |            | $\phi_1(c) = \kappa_1 \frac{I_1 X_1}{K_1 X_1 + I_1}$                                                                                       |  |  |  |
| 2                                 | Glucose utilization |       | $Y_{11,2}$ |            |            |            | $\phi_2(c) = \kappa_2 \frac{S_1 X_1}{K_2 + S_1}$                                                                                           |  |  |  |
| 3                                 | Lactate utilization |       |            | $Y_{12,3}$ |            |            | $\phi_3(c) = \kappa_3 \frac{S_2 X_2}{K_3 + S_2}$                                                                                           |  |  |  |
| 4                                 | Homoacetogenesis    |       |            |            | $Y_{13,4}$ |            | $\phi_4(c) = \kappa_4 \frac{S_3 X_3}{K_3 + S_3}$                                                                                           |  |  |  |
| 5                                 | Methanogenesis      |       |            |            |            | $Y_{14,5}$ | $\phi_5(c) = \kappa_5 \frac{S_3 X_4}{K_5 + S_3} I_{pH}$                                                                                    |  |  |  |
|                                   |                     |       |            |            |            |            | with $I_{pH} = \begin{cases} \exp(-3(\frac{pH - pH_U}{pH_U - pH_L})^2) & \text{if } pH < pH_U, \\ 1 & \text{if } pH \geq pH_U \end{cases}$ |  |  |  |
| 6                                 | Decay of $X_1$      |       | -1         |            |            |            | $\phi_6(c) = \kappa_{6,1} X_1$                                                                                                             |  |  |  |
| 7                                 | Decay of $X_2$      |       |            | -1         |            |            | $\phi_7(c) = \kappa_{7,1} X_2$                                                                                                             |  |  |  |
| 8                                 | Decay of $X_3$      |       |            |            | -1         |            | $\phi_8(c) = \kappa_{8,1} X_3$                                                                                                             |  |  |  |
| 9                                 | Decay of $X_4$      |       |            |            |            | -1         | $\phi_9(c) = \kappa_{9,1} X_4$                                                                                                             |  |  |  |

herein referred to as the *e*MT-model of carbohydrate digestion. Biochemical parameters for biomass within a group were generated as follows:

$$P_{i,j} = \mathcal{N}(P_i, \sigma), \quad (15)$$

204 where  $P_{i,j}$  is a biochemical reaction parameters (maximum specific growth  
205 rate, half-saturation concentration) for the  $j$ th strain of biomass functional  
206 group  $i$ , chosen randomly from the set of values normally distributed around  
207  $P_i$ , the default/set value for the parameter assuming single strain represen-  
208 tation, with standard deviation as indicated by  $\sigma$ .

This microbial representation extension can be applied naturally in rate models of fermentation (11) and biomaterial decay (13) as previously defined, as each biomass representative within a functional group has its particular parameter set. However, enzymatic hydrolysis of fiber described by contours kinetics must be modeled as followed:

$$\phi_1 = \frac{I \sum_{j=1}^{n_1} \kappa_{1,j} X_{1,j}}{I + \sum_{j=1}^{n_1} K_{1,j} X_{1,j}}, \quad (16)$$

209 where indices, variables and parameters are as defined previously.

## 210 **2.2 Component Exchange**

211 The MT-model of [2] also considered separate biochemical environments,  
212 the lumen and mucus. Exchange of material **c** occurs between these layers  
213 both as active (attachment, absorption, detachment) and passive (diffusion)  
214 transport. These exchange terms are all linear and vary based on their di-  
215 rectionality.



**Attachment (lumen  $\rightarrow$  mucus):** The active transport of material from the lumen compartment to the mucus compartment. Included materials are lactate, acetate, propionate, butyrate, methane, carbon dioxide, water, and biomass functional groups. This process is modeled as:

$$E_{i,2} = \gamma_{1,i}c_{1,i} \quad (17)$$

**Absorption (mucus  $\rightarrow$  host):** The active removal of material from the mucus compartment by the body (lactate, acetate, propionate, butyrate, water) or removal as gas (hydrogen, carbon dioxide). This process is modeled as:

$$E_{i,1} = \gamma_{2,i}c_{2,i} \quad (18)$$

**Diffusion (mucus  $\leftrightarrow$  lumen):** The passive transport of material between lumen and mucus compartments. Only sugar undergoes diffusive transport. This process is modeled as:

$$E_{i,3} = \frac{\gamma_{3,i}}{V_l}(c_{1,i} - c_{2,i}) \quad (19)$$

**Sloughing/Detachment (mucus  $\rightarrow$  lumen):** The active removal of material from the mucus back into the lumen. Materials involved in sloughing include particular fiber and biomass functional groups. This process is modeled as:

$$E_{i,4} = \gamma_{4,i}c_{2,i} \quad (20)$$

216 The rate of exchange varies from location to location along the length of  
 217 the colon. Experimental approximations for these exchange rates are taken  
 218 for the coarsely defined locations of the colon (proximal, transverse, distal).  
 219 The MT-model applied in [2] considers a 3-stage reactor system physical rep-  
 220 resentation analogous to commonly used *in vitro* systems [15], allowing for  
 221 easy adaptation of experimentally derived exchange parameter approxima-  
 222 tions. To model the colon as a continuous system, we interpolate exchange  
 223 parameters as a function of location  $x$  by constructing natural cubic splines  
 224 approximating parameters as a function of length along the colon, using the  
 225 algorithm described in [16]. We define transition points and regions, outside  
 226 of which parameters are treated as they would be discretely. For example,  
 227 we determine the central transition points to be 14% and 42% along the  
 228 length of the colon, from proximal to transverse and then transverse to dis-  
 229 tal, respectively, based on approximate colon dimensions [5], and the region  
 230 of transition to be 10% (as to prevent overlap of regions). This means that  
 231 0-4%, 24-32% and 52-100% inclusive along the length of the colon will take  
 232 the strict parameters associated with discrete proximal, transverse and dis-  
 233 tal colons, respectively, while the regions of 4-24%, and 32-52% exclusive will  
 234 transition between the discrete bounds using the cubic approximation. By  
 235 constructing these spline functions, we emphasize the lack of obvious rep-  
 236 resentation of physiological colon parameters as a function of space due to  
 237 unavailability of spatially continuous data.

## 238 2.3 Transport

As stated previously, we assume that all forces involved in peristaltic movement can be captured in a single *average* flow rate term, which translates to a single convective velocity term

$$F(\mathbf{c}) = \bar{v}\mathbf{c}, \quad (21)$$

where the convective velocity  $\bar{v}$  is approximated as:

$$\bar{v} = \begin{cases} 0.001 \frac{q}{\pi r^2} & \text{for lumen components} \\ 0 & \text{for mucus components} \end{cases} \quad (22)$$

where  $q$  is the average flow rate [L/d] (back-calculated using mean transit times),  $r$  is the cross-sectional radius [m], and 0.001 is the metric conversion from litres to cubic meters. As noted in the model assumptions, we treat the colon as a tube with constant cross-sectional radius, meaning the convective velocity is not a function of location  $x$ . And so the full model with convective flux evaluated as a velocity term would take the form:

$$\partial_t \mathbf{c} + \bar{v} \partial_x \mathbf{c} = R(\mathbf{c}) + E(\mathbf{c}) \quad (23)$$

239 We expect that a simple *average flow rate*-type approximation will be suitable  
 240 when simulating the behaviour of colons exhibiting healthy transit times,  
 241 implicitly assuming well-mixed material and subsequently equal probability  
 242 exchange. However, the assumptions of well-mixed material should naturally  
 243 deteriorate as we move along the colon and the viscosity of digesta increases.  
 244 Describing the physics of these viscosity changes is a current work in progress.

## 245 **2.4 Endogenous Processes**

In our model, we primarily focus on dietary materials and their by-products; effectively disconnecting the colon from other physiological systems. This is seen in the way we account for SCFA absorption as a simple removal term rather than attempting to track its behavior in the body. We do, however, include a description of endogenous mucus production as it is an important stabilizing nutrient source for intestinal microflora. We model the rate of endogenous mucus production  $\Lambda$  as:

$$\Lambda = \Gamma \left( 1 - \frac{I_2}{I_M} \right), \quad (24)$$

246 where  $I_2$  is the fiber of polysaccharides in the mucus environment,  $\Gamma$  is the  
247 maximum endogenous mucus production rate [g/Ld], and  $I_M$  is the maxi-  
248 mum/critical density of fiber in the mucus environment. Including further  
249 endogenous processes, namely transport of material from the blood stream  
250 into the colon, is a potential model extension.

## 251 **3 Complete Model**

252 The complete model can be formulated by combining the previously described  
253 reaction, exchange and flow processes. To avoid any ambiguity, we write out  
254 all partial differential equations that compose the model.

## Lumen Components:

### Sugar ( $S_{1,1}$ ):

$$\begin{aligned}
 \partial_t S_{1,1} + \bar{v}_l \partial_x S_{1,1} = & Y_{1,1} \frac{I_{1,1} \sum_j^{n_1} \kappa_{1,j} X_{1,1,j}}{\left( \sum_j^{n_1} K_{1,j} X_{1,1,j} \right) + I_{1,1}} && \text{hydrolysis} \\
 & - \sum_j^{n_1} \frac{\kappa_{2,j} S_{1,1} X_{1,1,j}}{K_{2,j} + S_{1,1}} && \text{sugar utilization} \\
 & - \frac{\gamma_{3,1}}{V_l} (S_{1,1} - S_{2,1}) && \text{diffusion}
 \end{aligned}$$

### Lactate ( $S_{1,2}$ ):

$$\begin{aligned}
 \partial_t S_{1,2} + \bar{v}_l \partial_x S_{1,2} = & Y_{2,2} \sum_j^{n_1} \frac{\kappa_{2,j} S_{1,1} X_{1,1,j}}{K_{2,n_1} + S_{1,1}} && \text{sugar utilization} \\
 & - \sum_j^{n_2} \frac{\kappa_{3,j} S_{1,2} X_{1,2,j}}{K_{3,j} + S_{1,2}} && \text{lactate utilization} \\
 & - \gamma_{1,2} S_{1,2} && \text{attachment}
 \end{aligned}$$

### Hydrogen ( $S_{1,3}$ ):

$$\begin{aligned}
 \partial_t S_{1,3} + \bar{v}_l \partial_x S_{1,3} = & Y_{3,2} \sum_{n_1}^{N_1} \frac{\kappa_{2,n_1} S_{1,1} X_{1,1,n_1}}{K_{2,n_1} + S_{1,1}} && \text{sugar utilization} \\
 & + Y_{3,3} \sum_{n_2}^{N_2} \frac{\kappa_{3,n_2} S_{1,2} X_{1,2,n_2}}{K_{3,n_2} + S_{1,2}} && \text{lactate utilization} \\
 & - \sum_{n_3}^{N_3} \frac{\kappa_{4,n_3} S_{1,3} X_{1,3,n_3}}{K_{4,n_3} + S_{1,3}} && \text{acetogenesis} \\
 & - \sum_{n_3}^{N_3} \frac{\kappa_{5,n_3} S_{1,3} X_{1,4,n_4}}{K_{5,n_4} + S_{1,3}} I_{pH}(x) && \text{methanogenesis}
 \end{aligned}$$

**Acetate ( $S_{1,4}$ ):**

$$\begin{aligned}
\partial_t S_{1,4} + \bar{v}_l \partial_x S_{1,4} = & Y_{4,2} \sum_{n_1}^{N_1} \frac{\kappa_{2,n_1} S_{1,1} X_{1,1n_1}}{K_{2,n_1} + S_{1,1}} && \text{sugar utilization} \\
& + Y_{4,3} \sum_{n_2}^{N_2} \frac{\kappa_{3,n_2} S_{1,2} X_{1,2n_2}}{K_{3,n_2} + S_{1,2}} && \text{lactate utilization} \\
& + Y_{4,4} \sum_{n_3}^{N_3} \frac{\kappa_{4,n_3} S_{1,3} X_{1,3n_3}}{K_{4,n_3} + S_{1,3}} && \text{acetogenesis} \\
& - \gamma_{1,4} S_{1,4} && \text{attachment}
\end{aligned}$$

**Propionate ( $S_{1,5}$ ):**

$$\begin{aligned}
\partial_t S_{1,5} + \bar{v}_l \partial_x S_{1,5} = & Y_{5,2} \sum_{n_1}^{N_1} \frac{\kappa_{2,n_1} S_{1,1} X_{1,1n_1}}{K_{2,n_1} + S_{1,1}} && \text{sugar utilization} \\
& + Y_{5,3} \sum_{n_2}^{N_2} \frac{\kappa_{3,n_2} S_{1,2} X_{1,2n_2}}{K_{3,n_2} + S_{1,2}} && \text{lactate utilization} \\
& - \gamma_{1,5} S_{1,5} && \text{attachment}
\end{aligned}$$

**Butyrate ( $S_{1,6}$ ):**

$$\begin{aligned}
\partial_t S_{1,6} + \bar{v}_l \partial_x S_{1,6} = & Y_{6,2} \sum_{n_1}^{N_1} \frac{\kappa_{2,n_1} S_{1,1} X_{1,1n_1}}{K_{2,n_1} + S_{1,1}} && \text{sugar utilization} \\
& + Y_{6,3} \sum_{n_2}^{N_2} \frac{\kappa_{3,n_2} S_{1,2} X_{1,2n_2}}{K_{3,n_2} + S_{1,2}} && \text{lactate utilization} \\
& - \gamma_{1,6} S_{1,6} && \text{attachment}
\end{aligned}$$

**Methane ( $S_{1,7}$ ):**

$$\begin{aligned}
\partial_t S_{1,7} + \bar{v}_l \partial_x S_{1,7} = & Y_{7,5} \sum_{n_4}^{N_4} \frac{\kappa_{5,n_2} S_{1,3} X_{1,4n_4}}{K_{5,n_4} + S_{1,3}} I_{pH}(x) && \text{methanogenesis} \\
& - \gamma_{1,7} S_{1,7} && \text{attachment}
\end{aligned}$$

**Carbon dioxide ( $S_{1,8}$ ):**

$$\begin{aligned}
\partial_t S_{1,8} + \bar{v}_l \partial_x S_{1,8} = & Y_{8,2} \sum_{n_1}^{N_1} \frac{\kappa_{2,n_1} S_{1,1} X_{1,1n_1}}{K_{2,n_1} + S_{1,1}} && \text{sugar utilization} \\
& + Y_{8,3} \sum_{n_2}^{N_2} \frac{\kappa_{3,n_2} S_{1,2} X_{1,2n_2}}{K_{3,n_2} + S_{1,2}} && \text{lactate utilization} \\
& + Y_{8,4} \sum_{n_3}^{N_3} \frac{\kappa_{4,n_3} S_{1,3} X_{1,3n_3}}{K_{4,n_3} + S_{1,3}} && \text{acetogenesis} \\
& + Y_{8,5} \sum_{n_4}^{N_4} \frac{\kappa_{5,n_4} S_{1,3} X_{1,4n_4}}{K_{5,n_4} + S_{1,3}} I_{pH}(x) && \text{methanogenesis} \\
& - \gamma_{1,8} S_{1,8} && \text{attachment}
\end{aligned}$$

**Water ( $S_{1,9}$ ):**

$$\begin{aligned}
\partial_t S_{1,9} + \bar{v}_l \partial_x S_{1,9} = & Y_{9,2} \sum_{n_1}^{N_1} \frac{\kappa_{2,n_1} S_{1,1} X_{1,1n_1}}{K_{2,n_1} + S_{1,1}} && \text{sugar utilization} \\
& + Y_{9,3} \sum_{n_2}^{N_2} \frac{\kappa_{3,n_2} S_{1,2} X_{1,2n_2}}{K_{3,n_2} + S_{1,2}} && \text{lactate utilization} \\
& + Y_{9,4} \sum_{n_3}^{N_3} \frac{\kappa_{4,n_3} S_{1,3} X_{1,3n_3}}{K_{4,n_3} + S_{1,3}} && \text{acetogenesis} \\
& + Y_{9,5} \sum_{n_4}^{N_4} \frac{\kappa_{5,n_4} S_{1,3} X_{1,4n_4}}{K_{5,n_4} + S_{1,3}} I_{pH}(x) && \text{methanogenesis} \\
& - \gamma_{1,9} S_{1,9} && \text{attachment}
\end{aligned}$$

**Fiber ( $I_{1,1}$ ):**

$$\begin{aligned}
\partial_t I_{1,1} + \bar{v}_l \partial_x I_{1,1} = & - \frac{I_{1,1} \sum_{n_1}^{N_1} \kappa_{1,n_1} Y_{1,1n_1} X_{1,n_1}}{\left( \sum_{n_1}^{N_1} K_{1,n_1} X_{1,1n_1} \right) + I_{1,1}} && \text{hydrolysis} \\
& + \left( \frac{V_m}{V_l} \right) \gamma_{4,10} I_{2,1} && \text{sloughing}
\end{aligned}$$

**Sugar Degraders ( $X_{1,1,n_1}$ ):**

$$\begin{aligned}
\forall n_1 \leq N_1 : \partial_t X_{1,1,n_1} + \bar{v}_l \partial_x X_{1,1,n_1} = & Y_{11,2} \frac{\kappa_{2,n_1} S_{1,1} X_{1,1,n_1}}{K_{2,n_1} + S_{1,1}} && \text{sugar utilization} \\
& - \gamma_{1,11,n_1} X_{1,1,n_s} && \text{attachment} \\
& + \left( \frac{V_m}{V_l} \right) \gamma_{4,11,n_1} X_{2,11,n_1} && \text{sloughing} \\
& - \kappa_{6,n_1} X_{1,1,n_s} && \text{decay}
\end{aligned}$$

**Lactate Degraders ( $X_{1,2,n_2}$ ):**

$$\begin{aligned}
\forall n_2 \leq N_2 : \partial_t X_{1,2,n_2} + \bar{v}_l \partial_x X_{1,2,n_2} = & Y_{12,3} \frac{\kappa_{3,n_2} S_{1,2} X_{1,2,n_2}}{K_{3,n_2} + S_{1,2}} && \text{lactate utilization} \\
& - \gamma_{1,12,n_2} X_{1,2,n_l} && \text{attachment} \\
& + \left( \frac{V_m}{V_l} \right) \gamma_{4,12,n_2} X_{2,2,n_2} && \text{sloughing} \\
& - \kappa_{7,n_2} X_{1,2,n_2} && \text{decay}
\end{aligned}$$

**Hydrogen Degrading Acetogens ( $X_{1,3,n_3}$ ):**

$$\begin{aligned}
\forall n_3 \leq N_3 : \partial_t X_{1,3,n_3} + \bar{v}_l \partial_x X_{1,3,n_3} = & Y_{13,4} \frac{\kappa_{4,n_3} S_{1,3} X_{1,3,n_3}}{K_{4,n_4} + S_{1,3}} && \text{acetogenesis} \\
& - \gamma_{1,13,n_3} X_{1,3,n_3} && \text{attachment} \\
& + \left( \frac{V_m}{V_l} \right) \gamma_{4,13,n_3} X_{2,3,n_3} && \text{sloughing} \\
& - \kappa_{8,n_3} X_{1,3,n_3} && \text{decay}
\end{aligned}$$

**Hydrogen Degrading Methanogens ( $X_{1,4,n_4}$ ):**

$$\begin{aligned}
\forall n_4 \leq N_4 : \partial_t X_{1,4,n_4} + \bar{v}_l \partial_x X_{1,4,n_4} = & Y_{14,5} \frac{\kappa_{5,n_4} S_{1,3} X_{1,4,n_4}}{K_{5,n_4} + S_{1,3}} && \text{methanogenesis} \\
& - \gamma_{1,14,n_4} X_{1,4,n_4} && \text{attachment} \\
& + \left( \frac{V_m}{V_l} \right) \gamma_{4,14,n_4} X_{2,4,n_4} && \text{sloughing} \\
& - \kappa_{9,n_4} X_{1,4,n_4} && \text{decay}
\end{aligned}$$



## Mucus Components:

**Sugar ( $S_{2,1}$ ):**

$$\begin{aligned}
 \partial_t S_{2,1} = & Y_{1,1} \frac{I_{2,1} \sum_{n_1}^{N_1} \kappa_{1,n_1} X_{2,n_1}}{\left( \sum_{n_1}^{N_1} K_{1,n_1} X_{2,1n_1} \right) + I_{2,1}} && \text{hydrolysis} \\
 & - \sum_{n_1}^{N_1} \frac{\kappa_{2,n_1} S_{2,1} X_{2,1n_1}}{K_{2,n_1} + S_{2,1}} && \text{sugar utilization} \\
 & + \frac{\gamma_{3,1}}{V_m} (S_{1,1} - S_{2,1}) && \text{diffusion}
 \end{aligned}$$

**Lactate ( $S_{2,2}$ ):**

$$\begin{aligned}
 \partial_t S_{2,2} = & Y_{2,2} \sum_{n_1}^{N_1} \frac{\kappa_{2,n_1} S_{2,1} X_{2,1n_1}}{K_{2,n_1} + S_{2,1}} && \text{sugar utilization} \\
 & - \sum_{n_2}^{N_2} \frac{\kappa_{3,n_2} S_{2,2} X_{2,2n_2}}{K_{3,n_2} + S_{2,2}} && \text{lactate utilization} \\
 & + \left( \frac{V_l}{V_m} \right) \gamma_{1,2} S_{1,2} && \text{attachment} \\
 & - \gamma_{2,2} S_{2,2} && \text{absorption}
 \end{aligned}$$

**Hydrogen ( $S_{2,3}$ ):**

$$\begin{aligned}
 \partial_t S_{2,3} = & Y_{3,2} \sum_{n_1}^{N_1} \frac{\kappa_{2,n_1} S_{2,1} X_{2,1n_1}}{K_{2,n_1} + S_{2,1}} && \text{sugar utilization} \\
 & + Y_{3,3} \sum_{n_2}^{N_2} \frac{\kappa_{3,n_2} S_{2,2} X_{2,2n_2}}{K_{3,n_2} + S_{2,2}} && \text{lactate utilization} \\
 & - \sum_{n_3}^{N_3} \frac{\kappa_{4,n_3} S_{2,3} X_{2,3n_3}}{K_{4,n_3} + S_{2,3}} && \text{acetogenesis} \\
 & - \sum_{n_3}^{N_3} \frac{\kappa_{5,n_3} S_{2,3} X_{2,4n_4}}{K_{5,n_4} + S_{2,3}} I_{pH}(x) && \text{methanogenesis}
 \end{aligned}$$

**Acetate ( $S_{2,4}$ ):**

$$\begin{aligned}
\partial_t S_{2,4} = & Y_{4,2} \sum_{n_1}^{N_1} \frac{\kappa_{2,n_1} S_{2,1} X_{2,1n_1}}{K_{2,n_1} + S_{2,1}} && \text{sugar utilization} \\
& + Y_{4,3} \sum_{n_2}^{N_2} \frac{\kappa_{3,n_2} S_{2,2} X_{2,2n_2}}{K_{3,n_2} + S_{2,2}} && \text{lactate utilization} \\
& + Y_{4,4} \sum_{n_3}^{N_3} \frac{\kappa_{4,n_3} S_{2,3} X_{2,3n_3}}{K_{4,n_3} + S_{2,3}} && \text{acetogenesis} \\
& + \left( \frac{V_l}{V_m} \right) \gamma_{1,4} S_{1,4} && \text{attachment} \\
& - \gamma_{2,4} S_{2,4} && \text{absorption}
\end{aligned}$$

**Propionate ( $S_{2,5}$ ):**

$$\begin{aligned}
\partial_t S_{2,5} = & Y_{5,2} \sum_{n_1}^{N_1} \frac{\kappa_{2,n_1} S_{2,1} X_{1,1n_1}}{K_{2,n_1} + S_{2,1}} && \text{sugar utilization} \\
& + Y_{5,3} \sum_{n_2}^{N_2} \frac{\kappa_{3,n_2} S_{2,2} X_{2,2n_2}}{K_{3,n_2} + S_{2,2}} && \text{lactate utilization} \\
& + \left( \frac{V_l}{V_m} \right) \gamma_{1,5} S_{1,5} && \text{attachment} \\
& - \gamma_{2,5} S_{2,5} && \text{absorption}
\end{aligned}$$

**Butyrate ( $S_{2,6}$ ):**

$$\begin{aligned}
\partial_t S_{2,6} = & Y_{6,2} \sum_{n_1}^{N_1} \frac{\kappa_{2,n_1} S_{2,1} X_{2,1n_1}}{K_{2,n_1} + S_{2,1}} && \text{sugar utilization} \\
& + Y_{6,3} \sum_{n_2}^{N_2} \frac{\kappa_{3,n_2} S_{2,2} X_{2,2n_2}}{K_{3,n_2} + S_{2,2}} && \text{lactate utilization} \\
& + \left( \frac{V_l}{V_m} \right) \gamma_{1,6} S_{1,6} && \text{attachment} \\
& - \gamma_{2,6} S_{2,6} && \text{absorption}
\end{aligned}$$

**Methane ( $S_{2,7}$ ):**

$$\begin{aligned}
\partial_t S_{2,7} = & Y_{7,5} \sum_{n_4}^{N_4} \frac{\kappa_{5,n_2} S_{2,3} X_{2,4n_4}}{K_{5,n_4} + S_{2,3}} I_{pH}(x) && \text{methanogenesis} \\
& + \left( \frac{V_l}{V_m} \right) \gamma_{1,7} S_{1,7} && \text{attachment} \\
& - \gamma_{2,7} S_{2,7} && \text{absorption}
\end{aligned}$$

**Carbon dioxide ( $S_{2,8}$ ):**

$$\begin{aligned}
\partial_t S_{2,8} = & Y_{8,2} \sum_{n_1}^{N_1} \frac{\kappa_{2,n_1} S_{2,1} X_{2,1n_1}}{K_{2,n_1} + S_{2,1}} && \text{sugar utilization} \\
& + Y_{8,3} \sum_{n_2}^{N_2} \frac{\kappa_{3,n_2} S_{2,2} X_{2,2n_2}}{K_{3,n_2} + S_{2,2}} && \text{lactate utilization} \\
& + Y_{8,4} \sum_{n_3}^{N_3} \frac{\kappa_{4,n_3} S_{2,3} X_{2,3n_3}}{K_{4,n_3} + S_{2,3}} && \text{acetogenesis} \\
& + Y_{8,5} \sum_{n_4}^{N_4} \frac{\kappa_{5,n_4} S_{2,3} X_{2,4n_4}}{K_{5,n_4} + S_{2,3}} I_{pH}(x) && \text{methanogenesis} \\
& + \left( \frac{V_l}{V_m} \right) \gamma_{1,8} S_{1,8} && \text{attachment} \\
& - \gamma_{2,8} S_{2,8} && \text{absorption}
\end{aligned}$$

**Water ( $S_{2,9}$ ):**

$$\begin{aligned}
\partial_t S_{2,9} = & Y_{9,2} \sum_{n_1}^{N_1} \frac{\kappa_{2,n_1} S_{2,1} X_{2,1n_1}}{K_{2,n_1} + S_{2,1}} && \text{sugar utilization} \\
& + Y_{9,3} \sum_{n_2}^{N_2} \frac{\kappa_{3,n_2} S_{2,2} X_{2,2n_2}}{K_{3,n_2} + S_{2,2}} && \text{lactate utilization} \\
& + Y_{9,4} \sum_{n_3}^{N_3} \frac{\kappa_{4,n_3} S_{2,3} X_{2,3n_3}}{K_{4,n_3} + S_{2,3}} && \text{acetogenesis} \\
& + Y_{9,5} \sum_{n_4}^{N_4} \frac{\kappa_{5,n_4} S_{2,3} X_{2,4n_4}}{K_{5,n_4} + S_{2,3}} I_{pH}(x) && \text{methanogenesis} \\
& + \left( \frac{V_l}{V_m} \right) \gamma_{1,9} S_{1,9} && \text{attachment} \\
& - \gamma_{2,9} S_{2,9} && \text{absorption}
\end{aligned}$$

**Mucins ( $I_{2,1}$ ):**

$$\begin{aligned}
\partial_t I_{2,1} = & \Lambda && \text{endogenous production} \\
& - \frac{I_{2,1} \sum_{n_1}^{N_1} \kappa_{1,n_1} Y_{1,1} X_{2,n_1}}{\left( \sum_{n_1}^{N_1} K_{1,n_1} X_{2,1n_1} \right) + I_{2,1}} && \text{hydrolysis} \\
& - \gamma_{4,10} I_{2,1} && \text{sloughing}
\end{aligned}$$

**Sugar Degraders ( $X_{2,1,n_1}$ ):**

$$\begin{aligned}
\forall n_1 \leq N_1 : \partial_t X_{2,1n_1} = & Y_{11,2} \frac{\kappa_{2,n_1} S_{2,1} X_{2,1n_1}}{K_{2,n_1} + S_{2,1}} && \text{sugar utilization} \\
& + \left( \frac{V_l}{V_m} \right) \gamma_{1,11n_1} X_{1,1n_s} && \text{attachment} \\
& - \gamma_{4,11n_1} X_{2,11n_1} && \text{sloughing} \\
& - \kappa_{6,n_1} X_{2,1n_s} && \text{decay}
\end{aligned}$$

**Lactate Degraders ( $X_{2,2,n_2}$ ):**

$$\begin{aligned}
\forall n_2 \leq N_2 : \partial_t X_{2,2,n_2} + \bar{v}_l \partial_x X_{2,2,n_2} = & Y_{12,3} \frac{\kappa_{3,n_2} S_{2,2} X_{2,2,n_2}}{K_{3,n_2} + S_{2,2}} && \text{lactate utilization} \\
& + \left( \frac{V_l}{V_m} \right) \gamma_{1,12n_2} X_{1,2n_l} && \text{attachment} \\
& - \gamma_{4,12n_2} X_{2,2n_2} && \text{sloughing} \\
& - \kappa_{7,n_2} X_{2,2n_2} && \text{decay}
\end{aligned}$$

**Hydrogen Degrading Acetogens ( $X_{2,3,n_3}$ ):**

$$\begin{aligned}
\forall n_3 \leq N_3 : \partial_t X_{2,3,n_3} + \bar{v}_l \partial_x X_{2,3,n_3} = & Y_{13,4} \frac{\kappa_{4,n_3} S_{2,3} X_{2,3,n_3}}{K_{4,n_4} + S_{2,3}} && \text{acetogenesis} \\
& + \left( \frac{V_l}{V_m} \right) \gamma_{1,13n_3} X_{1,3n_3} && \text{attachment} \\
& + \gamma_{4,13n_3} X_{2,3n_3} && \text{sloughing} \\
& - \kappa_{8,n_3} X_{2,3n_3} && \text{decay}
\end{aligned}$$

**Hydrogen Degrading Methanogens ( $X_{2,4,n_4}$ ):**

$$\begin{aligned}
\forall n_4 \leq N_4 : \partial_t X_{2,4,n_4} + \bar{v}_l \partial_x X_{2,4,n_4} = & Y_{14,5} \frac{\kappa_{5,n_4} S_{2,3} X_{2,4,n_4}}{K_{5,n_4} + S_{2,3}} && \text{methanogenesis} \\
& + \left( \frac{V_l}{V_m} \right) \gamma_{1,14n_4} X_{1,4n_4} && \text{attachment} \\
& - \gamma_{4,14n_4} X_{2,4n_4} && \text{sloughing} \\
& - \kappa_{9,n_4} X_{2,4n_4} && \text{decay}
\end{aligned}$$

## 257 4 Numerical Treatment and Considerations

The described continuous model takes a structure similar to many transport models with reactions seen in Chemical Engineering problems. The combination of both non-linear reaction terms and linear exchange terms between a

fluid and stationary medium creates individual processes proceeding at different time scales, creating significant stiffness in the source terms. To integrate our stiff model, we apply a central scheme for balance laws as described in [17]. To begin, we re-write model (1) by:

$$c_t + f(c)_x = g(c) \quad (25)$$

where  $f(c)$  is the flux of material (simply first-order convection in our model), and  $g(c)$  is representative of stiff source terms, as to follow the standards presented in [17].

To solve numerically, we discretize Equation (25) in both space and time:

$$\Delta x = \frac{L}{N+1}, \quad \Delta t \leq \frac{\Delta x}{2\bar{v}},$$

where  $L$  is the length of the colon, and  $N$  is the number of grid points used to discretize the continuous length. The resulting discrete representation of the model (25) is presented as:

$$\begin{aligned} u_{\chi+1/2}^{\tau+1} &= \frac{1}{2} (u_{\chi}^{\tau} + u_{\chi+1}^{\tau}) + \frac{1}{8} (u'_{\chi} - u'_{\chi+1}) - \frac{\Delta t}{\Delta x} \left( f(u_{\chi+1}^{\tau+1/2}) - f(u_{\chi}^{\tau+1/2}) \right) \\ &+ \Delta t \left( \frac{3}{8} g(u_{\chi}^{\tau+1/3}) + \frac{3}{8} g(u_{\chi+1}^{\tau+1/3}) + \frac{1}{4} g(u_{\chi+1/2}^{\tau+1}) \right), \end{aligned} \quad (26)$$

where  $u_{\chi}^{\tau}$  is the approximate concentration of measured quantity [g/L] at the index  $\tau$  time step and index  $\chi$ th location. Equation (26) solves for concentration  $u_{\chi+1/2}^{\tau+1}$  at the current time index  $(\tau + 1)$  on a staggered grid (center of grid nodes), requiring previous (time level  $\tau$ ) and intermediate (time level  $\tau + 1/3$ ,  $\tau + 1/2$ ) solutions at the edge of grid nodes. Model (26) is then a system of nonlinear equations that requires iterative solving.

270 Values at intermediate time levels,  $u_{\chi}^{\tau+1/2}$  and  $u_{\chi}^{\tau+1/3}$ , are solved using an  
 271 implicit fractional step:

$$\begin{aligned} u_{\chi}^{\tau+1/2} &= u_{\chi}^{\tau} + \frac{\Delta t}{2} \left( g(u_{\chi}^{\tau+1/2}) - \frac{f'_{\chi}}{\Delta x} \right), \\ u_{\chi}^{\tau+1/3} &= u_{\chi}^{\tau} + \frac{\Delta t}{3} \left( g(u_{\chi}^{\tau+1/3}) - \frac{f'_{\chi}}{\Delta x} \right), \end{aligned}$$

272 and the values of  $u'_{\chi}$  and  $f'_{\chi}$  are first order approximation of the spatial  
 273 derivatives of the field and the flux, respectively. As in [17], we employ the  
 274 following flux-limiter treatment:

$$\begin{aligned} u'_{\chi} &= \text{MM}(u_{\chi+1} - u_{\chi} - \frac{1}{2}D_{\chi+\frac{1}{2}}u, u_{\chi} - u_{\chi-1} + \frac{1}{2}D_{\chi-\frac{1}{2}}u), \quad \text{where} \\ D_{\chi+\frac{1}{2}}u &= \text{MM}(u_{\chi+2} - 2u_{\chi+1} + u_{\chi}, u_{\chi+1} - 2u_{\chi} + u_{\chi-1}), \quad \text{and} \\ \text{MM}(x, y) &= \begin{cases} \text{sgn}(x) \cdot \min(|x|, |y|) & \text{if } \text{sgn}(x) = \text{sgn}(y), \\ 0 & \text{otherwise.} \end{cases} \end{aligned}$$

275 to approximate spatial derivatives. In summary, the approximate solution at  
 276 the current time step requires the evaluations of 5 non-linear problems using  
 277 the previous solution at 6 discrete edges (3 on either side).

## 278 4.1 Boundary Conditions

279 To complete the model, boundary conditions must be specified at the up-  
 280 stream end of the lumen for all dependent variables. These boundary values  
 281 are analogous to the bolus composition and frequency entering the large in-  
 282 testine.

283 Because we do not explicitly model the pre-colon processes, we make use  
 284 of a *black-box* representation of the upper-GI tract, modeling the transport

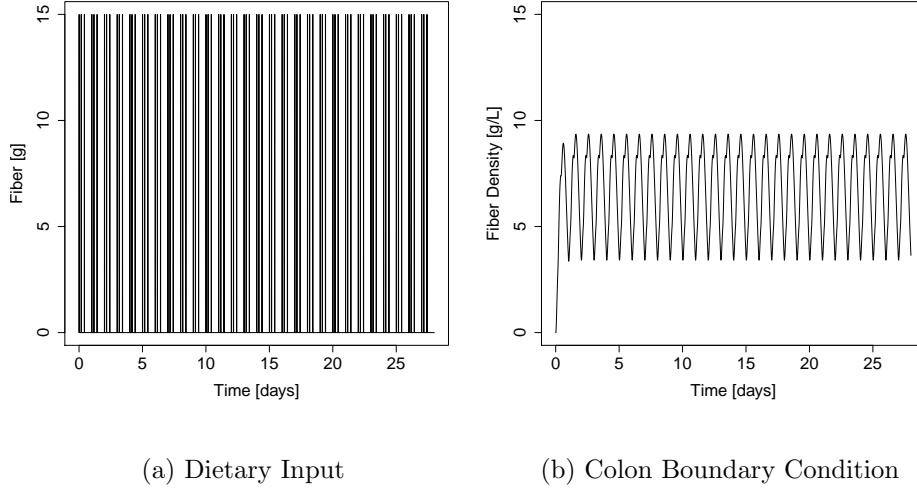

Figure 2: Effect of black-box treatment on periodic impulsed diet (3 x 15g per day, at hour 0, 4, 10 every 24 hours).

285 of dietary input from mouth to colon as a sequence of dilution units. This  
 286 process effectively buffers sharp input conditions, which is appropriate when  
 287 considering the pathway of dietary inputs traveling through the GI-tract to  
 288 the colon. A sequence of dilution units is modeled as:

$$u_1 = D(u_o - u_1) \quad \text{for first unit} \quad (27)$$

$$u_k = D(u_{k-1} - u_i) \quad \text{for sequential units} \quad (28)$$

289 where  $D$  is the dilution rate found using the system flow rate and an approx-  
 290 imate volume of pre-colon organs, and  $u_i$  is the density of material [g/L] in  
 291 vessel  $k$ , with the density from the final dilution reservoir being the input to  
 292 the colon model. We define the initial density into the first dilution unit  $u_o$



293 as a periodic piece-wise impulse function, representative of a feeding pattern.  
294 Figure 2 demonstrates the effect of dilution treatment on an impulsive diet  
295 regiment.

## 296 4.2 Numerical Implementation

297 The developed mathematical model of variable problem-size and function-  
298 ally defined sub-processes presents significant organizational challenges dur-  
299 ing numerical simulation. Additionally, simulation of large models will in-  
300 variably create large data-sets, both with analytical and visualization chal-  
301 lenges. The compuGUT software project stems from these design challenges,  
302 providing interested users a preliminary model implementation for review  
303 and experimentation [18](Chapter 4). Source codes, user-friendly opera-  
304 tion and visualization scripts, additional files and resources, as well as pre-  
305 compiled 32 and 64bit Linux binaries are available under GNUv3 licensing  
306 at [compugut.sourceforge.net](http://compugut.sourceforge.net).

## 307 4.3 Numerical Verification

308 **Mass Conservation:** To confirm mass conservation of the digestion sub-  
309 model, numerical simulations of the model were executed. These simulations  
310 were conducted under *batch* operation assumptions (no input or output of  
311 mass), and natural decay/death of biomass is not considered. As such, the  
312 total mass of material initializing the system must equal the total mass of  
313 material at steady state. The results of this simulation scenario are presented

Table 11: Verification of mass conservation

| Material       | Initial Mass [g] | Final Mass [g] | Difference [g] |
|----------------|------------------|----------------|----------------|
| glucose        | 0                | 0              | 0              |
| lactate        | 0                | 0              | 0              |
| hydrogen       | 0                | 0              | 0              |
| acetate        | 0                | 6.826067       | 6.826067       |
| propionate     | 0                | 8.221962       | 8.221962       |
| butyrate       | 0                | 2.666459       | 2.666459       |
| methane        | 0                | 0.061338       | 0.061338       |
| carbon dioxide | 0                | 3.946864       | 3.946864       |
| water          | 0                | 11.168698      | 11.168698      |
| fiber          | 50               | 0              | -50            |
| SD Biomass     | 10               | 27.120000      | 17.120000      |
| LD Biomass     | 8                | 9.712153       | 1.712153       |
| HDA Biomass    | 2                | 2.871074       | 0.871074       |
| HDM Biomass    | 0.5              | 0.935495       | 0.435495       |
| Total          | 70.5             | 73.53011       | <b>3.03011</b> |

in Table 11.

The difference between final and initial mass is 3.03 grams. The ammonia necessary for this set of reactions to proceed given the initial fiber mass is 3.201 grams of ammonia. Therefore, 0.171 grams, or 0.2%, of unidentified material is lost during calculations. This mass lost in the system can be attributed to computational precision (rounding and truncation errors).

**Spatial Discretization Errors:** To verify the convergence and efficiency of the numerical implementation, we perform a grid refinement study. The

grid level, or number of discrete representations of the colon length, is given by:

$$N = 50 \times 2^g + 1, \quad g \in [0, 1, \dots, 5], \quad (29)$$

320 where  $g$  is the grid index, used to systematically generate comparable grids.  
 321 Simulations were undertaken at every grid level, with continuous input condi-  
 322 tions (versus impulsive diets discussed previously) for convenience. Addition-  
 323 ally, simulations were run with single-species representations of each biomass  
 324 group (MT-model of carbohydrate digestion) with default parameters.

Convergence is assessed by comparing the output of all dependent variables at the colon output at a specific time in the simulation ( $\approx 6.35$  days). For ease-of-presentation, we include only the concentration of sugar utilizing biomass in Table 12. Additionally, convergence order is assessed by calculating the rate of error reduction,  $\theta$ , between solutions of sequential grid resolutions as follows:

$$\theta = \frac{\left\| 1 - \frac{f_e(X_{g+1})}{f_e(X_\infty)} \right\|_2}{\left\| 1 - \frac{f_e(X_g)}{f_e(X_\infty)} \right\|_2}, \quad g \in [0, 1, \dots, 4], \quad (30)$$

325 where  $X_g$  is an array of concentrations of all dependent variables at all loca-  
 326 tions for the specified grid index ( $g$ ) and at the specified time ( $\approx 6.35$  days),  
 327  $X_\infty$  is an array of concentrations of all dependent variables at the highest  
 328 grid level (6), and  $f_e(X)$  is an extrapolation function, taking the solutions of  
 329  $X$  at the 51 locations of the coarse most discretization scheme. The result  
 330 of this convergence-order assessment is highlighted in Table 12.

Table 12: Summary of simulation results for changing grid index,  $g$ , giving total number of grid points,  $N$ . Sugar Degrading Biomass Density (SDBD) converges towards approximately 27.75 g/L at colon output, with first-order convergence (using rate of error reduction).

| g | N    | SDBD [g/L] | Relative Error |
|---|------|------------|----------------|
| 0 | 51   | 13.65207   | 0.005          |
| 1 | 101  | 13.61938   | 0.002          |
| 2 | 201  | 13.60245   | 0.001          |
| 3 | 401  | 13.59373   | 6e(-4)         |
| 4 | 801  | 13.58926   | 3e(-4)         |
| 5 | 1601 | 13.58696   | 9e(-5)         |
| 6 | 3201 | 13.58579   |                |

331 In addition to the refinement study, evaluation of the implementation with  
332 test scenarios were assessed for accuracy and consistency through repeated  
333 simulations [18](Chapter 4).

## 334 5 Concluding Remarks

335 The mathematical model as constructed is a highly simplified representa-  
336 tion of physiological mechanisms and system interplay in the colon, but uses  
337 assumptions regarding continuous flow, component exchange, and mucus rep-  
338 resentation that are comparable to *in vitro* systems currently employed in  
339 gut microflora experimentation [19, 20].

340 Additionally, the modeling framework is flexible and extensible, thus can  
341 be adapted to model a variety of input and initial conditions, and further

342 refined as more complete knowledge about physiological sub-processes is ac-  
343 quired.

## 344 References

- 345 [1] Tortora GJ, Derrickson BH. Principles of anatomy and physiology. John  
346 Wiley & Sons; 2008.
- 347 [2] Muñoz-Tamayo R, Laroche B, Walter É, Doré J, Leclerc M. Mathemati-  
348 cal modelling of carbohydrate degradation by human colonic microbiota.  
349 Journal of theoretical biology. 2010;266(1):189–201.
- 350 [3] Hester RL, Iliescu R, Summers R, Coleman TG. Systems biology  
351 and integrative physiological modelling. The Journal of physiology.  
352 2011;589(5):1053–1060.
- 353 [4] Helander HF, Fändriks L. Surface area of the digestive tract-revisited.  
354 Scandinavian journal of gastroenterology. 2014;49(6):681–689.
- 355 [5] Sadahiro S, Ohmura T, Yamada Y, Saito T, Taki Y. Analysis of length  
356 and surface area of each segment of the large intestine according to age,  
357 sex and physique. Surgical and Radiologic Anatomy. 1992;14(3):251–  
358 257.
- 359 [6] Cummings J, Macfarlane G. The control and consequences of bacte-  
360 rial fermentation in the human colon. Journal of Applied Bacteriology.  
361 1991;70(6):443–459.
- 362 [7] Batstone DJ. Mathematical modelling of anaerobic reactors treating  
363 domestic wastewater: Rational criteria for model use. Reviews in Envi-  
364 ronmental Science and Biotechnology. 2006;5(1):57–71.
- 365 [8] Batstone DJ, Keller J, Angelidaki I, Kalyuzhnyi S, Pavlostathis S, Rozzi  
366 A, et al. The IWA Anaerobic Digestion Model No 1(ADM 1). Water  
367 Science & Technology. 2002;45(10):65–73.
- 368 [9] Gusakov A, Sinitsyn A, Klyosov A. Kinetics of the enzymatic hydroly-  
369 sis of cellulose: 1. A mathematical model for a batch reactor process.  
370 Enzyme and microbial technology. 1985;7(7):346–352.
- 371 [10] Vavilin V, Rytov S, Lokshina LY. A description of hydrolysis kinet-  
372 ics in anaerobic degradation of particulate organic matter. Bioresource  
373 technology. 1996;56(2):229–237.

- 374 [11] Eastman JA, Ferguson JF. Solubilization of particulate organic carbon  
375 during the acid phase of anaerobic digestion. *Journal (Water Pollution  
376 Control Federation)*. 1981;p. 352–366.
- 377 [12] Vavilin V, Fernandez B, Palatsi J, Flotats X. Hydrolysis kinetics in  
378 anaerobic degradation of particulate organic material: An overview.  
379 *Waste management*. 2008;28(6):939–951.
- 380 [13] Stewart EJ, Madden R, Paul G, Taddei F. Aging and death in an  
381 organism that reproduces by morphologically symmetric division. *PLoS  
382 biology*. 2005;3(2):e45.
- 383 [14] Ramirez I, Volcke EI, Rajinikanth R, Steyer JP. Modeling microbial di-  
384 versity in anaerobic digestion through an extended ADM1 model. *Water  
385 research*. 2009;43(11):2787–2800.
- 386 [15] Molly K, Woestyne MV, Verstraete W. Development of a 5-step multi-  
387 chamber reactor as a simulation of the human intestinal microbial  
388 ecosystem. *Applied Microbiology and Biotechnology*. 1993;39(2):254–  
389 258.
- 390 [16] Press WH, Teukolsky SA, Vetterling WT, Flannery BP. *Numerical  
391 recipes in C: the art of scientific computing*, 1992. Cité en. 1992;p. 92.
- 392 [17] Liotta SF, Romano V, Russo G. Central schemes for balance laws of  
393 relaxation type. *SIAM Journal on Numerical Analysis*. 2000;38(4):1337–  
394 1356.
- 395 [18] Moorthy AS, Brooks SP, Kalmokoff M, Eberl HJ. compuGUT: An in  
396 silico tool for studying flora composition in the human large intestine;  
397 2015. [Http://compugut.sourceforge.net/preprint](http://compugut.sourceforge.net/preprint).
- 398 [19] Macfarlane GT, Macfarlane S. Models for intestinal fermentation: asso-  
399 ciation between food components, delivery systems, bioavailability and  
400 functional interactions in the gut. *Current opinion in biotechnology*.  
401 2007;18(2):156–162.
- 402 [20] Payne AN, Zihler A, Chassard C, Lacroix C. Advances and perspectives  
403 in in vitro human gut fermentation modeling. *Trends in biotechnology*.  
404 2012;30(1):17–25.
